# Supplementary material
Source: Springer Nature journal article supplement (https://www.springermedizin.de/resource/supplementary/12879_2011_1886_MOESM3_ESM.pdf/9443922)
Supplement: MOESM3 [file 9443922]

$P < 0.001^*$

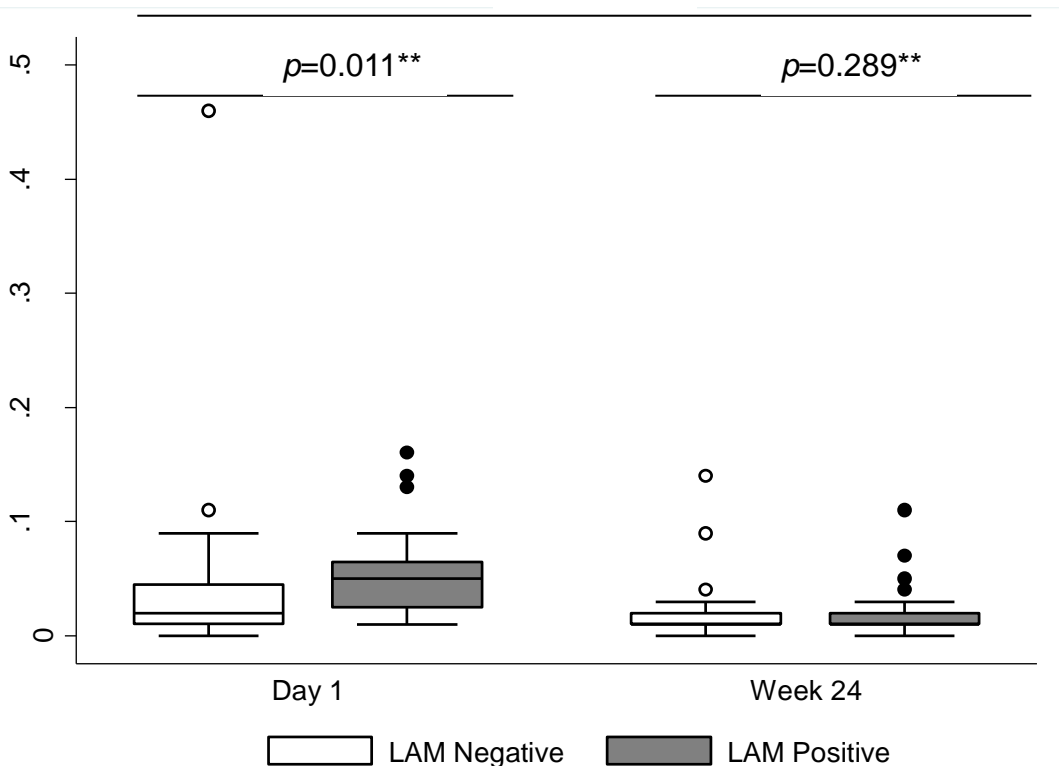

**Day 1**

**Week 24**

**LAM negative**

**LAM positive**

**LAM negative**

**LAM positive**

**No. of tests**

32

32

26

24

**Median P:C ratio**

0.02

0.05

0.01

0.01

**IQR+**

0.04

0.06

0.02

0.02

**IQR-**

0.01

0.03

0.01

0.01
